# Supplementary material for: Phytochemical Screening and Antibacterial Activity of Commercially Available Essential Oils Combinations with Conventional Antibiotics against Gram-Positive and Gram-Negative Bacteria
Source: Preprints.org preprint supplement (doi:10.20944/preprints202404.1441.v1), 2024-04-23

## Certificate of Analysis

Product Name:

Clove bud oil - natural, FCC, FG

Product Number: W232300  
Batch Number: SHBM5724  
Brand: ALDRICH  
CAS Number: 8000-34-8  
MDL Number: MFCD00130815  
Quality Release Date: 01 SEP 2020  
Expiration Date: AUG 2025

| Test                                    | Specification                    | Result       |
|-----------------------------------------|----------------------------------|--------------|
| Appearance (Color)                      | Pale Yellow to Light Amber-Brown | Light Yellow |
| Appearance (Form)                       | Liquid                           | Liquid       |
| Refractive index at 20 ° C              | 1.527 - 1.535                    | 1.534        |
| Infrared Spectrum                       | Conforms to Structure            | Conforms     |
| Assay                                   | ≥ 85.0 %                         | 88.0 %       |
| (Phenols by Volume)                     |                                  |              |
| Solubility (Turbidity)                  | Clear                            | Clear        |
| 1ml/2ml 70% ethanol; clear solution     |                                  |              |
| (may be cloudy upon dilution to 10 mls) |                                  |              |
| Angular Rotation                        | -1.50 - 0.00 °                   | -0.89 °      |
| 100 mm tube Neat                        |                                  |              |
| Specific Gravity                        | 1.038 - 1.060                    | 1.045        |
| @ 25 Degrees Celsius                    |                                  |              |
| Phenols                                 | Pass                             | Pass         |
| (FCC Misc.)                             |                                  |              |
| Arsenic (As)                            | ≤ 3 ppm                          | < 1 ppm      |
| Cadmium (Cd)                            | ≤ 1 ppm                          | < 1 ppm      |
| Mercury (Hg)                            | ≤ 1 ppm                          | < 1 ppm      |
| Lead (Pb)                               | ≤ 10 ppm                         | < 1 ppm      |
| Expiration Date Period                  |                                  |              |
| 5 Years                                 |                                  |              |

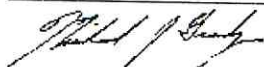

Michael Grady, Manager

Sigma-Aldrich warrants, that at the time of the quality release or subsequent retest date this product conformed to the information contained in this publication. The current Specification sheet may be available at [Sigma-Aldrich.com](http://Sigma-Aldrich.com). For further inquiries, please contact Technical Service. Purchaser must determine the suitability of the product for its particular use. See reverse side of invoice or packing slip for additional terms and conditions of sale.

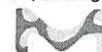

---



Sigma-Aldrich.

3050 Spruce Street, Saint Louis, MO 63103, USA

Website: [www.sigmaaldrich.com](http://www.sigmaaldrich.com)

Email USA: [techserv@sial.com](mailto:techserv@sial.com)

Outside USA: [eurtechserv@sial.com](mailto:eurtechserv@sial.com)

## Certificate of Analysis

Product Number: W232300  
Batch Number: SHBM5724

---

Quality Control  
Milwaukee, WI US

Sigma-Aldrich warrants, that at the time of the quality release or subsequent retest date this product conformed to the information contained in this publication. The current Specification sheet may be available at [Sigma-Aldrich.com](http://Sigma-Aldrich.com). For further inquiries, please contact Technical Service. Purchaser must determine the suitability of the product for its particular use. See reverse side of invoice or packing slip for additional terms and conditions of sale.

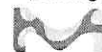

Supplement: Supplementary file 3 [file supplementary]
