# Supplementary material for: Phytochemical Screening and Antibacterial Activity of Commercially Available Essential Oils Combinations with Conventional Antibiotics against Gram-Positive and Gram-Negative Bacteria
Source: Preprints.org preprint supplement (doi:10.20944/preprints202404.1441.v1), 2024-04-23

## Certificate of Analysis

Product Name:

Peppermint oil - natural, from Mentha piperita L.

**Product Number:** 77411  
**Batch Number:** BCCJ7253  
**Brand:** ALDRICH  
**CAS Number:** 8006-90-4  
**Formula:** C<sub>10</sub>H<sub>16</sub>  
**Formula Weight:** 136,2 g/mol  
**Storage Temperature:** Store at 2 - 8 °C  
**Quality Release Date:** 16 DEC 2022

| Test                        | Specification                  | Result    |
|-----------------------------|--------------------------------|-----------|
| Appearance (Color)          | Colorless to Very Faint Yellow | Colorless |
| Appearance (Form)           | Liquid                         | Liquid    |
| Purity (GC)                 |                                | 71.3 %    |
| Report Result               |                                |           |
| Refractive index at 20 °C   | 1.450 - 1.470                  | 1.460     |
| <sup>1</sup> H NMR Spectrum | Conforms to Structure          | Conforms  |

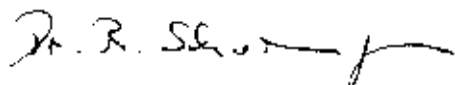

Dr. Reinhold Schwenninger  
Quality Assurance  
Buchs, Switzerland CH

Sigma-Aldrich warrants, that at the time of the quality release or subsequent retest date this product conformed to the information contained in this publication. The current Specification sheet may be available at [Sigma-Aldrich.com](http://Sigma-Aldrich.com). For further inquiries, please contact Technical Service. Purchaser must determine the suitability of the product for its particular use. See reverse side of invoice or packing slip for additional terms and conditions of sale.

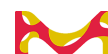

Supplement: Supplementary file 1 [file supplementary]
