# Supplementary material for: Phytochemical Screening and Antibacterial Activity of Commercially Available Essential Oils Combinations with Conventional Antibiotics against Gram-Positive and Gram-Negative Bacteria
Source: Preprints.org preprint supplement (doi:10.20944/preprints202404.1441.v1), 2024-04-23
Supplement: Supplementary file 2 [file supplementary]

**Certificate of Analysis**  
**Secondary pharmaceutical reference standard**

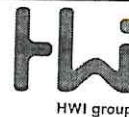

Substance: **Lavender oil**  
Article no: **0553-15-01**  
Batch: **HWI01630-2**  
Storage: **amber glass ampoule, storage at ambient temperature and under inert gas**  
Expiry date<sup>1)</sup>: **04/2022**

| Parameter                      | Method <sup>2)</sup>                                                                                                       | Requirement         | Result      |
|--------------------------------|----------------------------------------------------------------------------------------------------------------------------|---------------------|-------------|
| <b>Characters</b>              |                                                                                                                            |                     |             |
| Appearance                     | organoleptic                                                                                                               | light yellow liquid | complies    |
| Identity (GC) <sup>2)3)</sup>  | Ph. Eur. monograph<br>"Lavender oil"                                                                                       | Linalool            | complies    |
|                                |                                                                                                                            | Terpinen-4-ol       | complies    |
| Identity (HPTLC) <sup>3)</sup> | external method *                                                                                                          | Linalool            | complies**  |
| Assay (GC) <sup>2)</sup>       | Ph. Eur. monograph<br>"Lavender oil";<br>calibration standard:<br>primary reference standard<br>Linalool<br>batch HWI01135 | ---                 | 347.69 mg/g |

<sup>1)</sup> storage in unopened, original container according to specified conditions

<sup>2)</sup> GC conditions according to Ph. Eur. monograph

<sup>3)</sup> test only performed when substance is initially tested

\* chromatography performed by Camag, for method details see attachments

\*\* for HPTLC chromatogram and further details see attachments

checked and approved

09. APR. 2019

Dr. Ole Revermann

Project Leader Laboratory Services

Essential oil: Lavender oil  
Article-no.: 0553-15-01  
Batch: HWI01630-2  
Calibration standard: primary reference standard Linalool

GC method (Ph. Eur. Monograph "Lavender oil")

Column type: Supelcowax 10; 60 m x 0.25 mm; 0.25  $\mu$ m  
Carrier gas: Helium  
Flow: 1.5 ml/min  
Oven: 70 °C, 15 min, 2 °C/min, 180 °C  
Detector: 220 °C  
Injector: 220 °C  
Injection volume: 1  $\mu$ L  
Split: 1:50  
Run time: 70 min

Internal standard solution

Dissolve 150 mg trans-Anethole – accurately weighed - in 50 mL heptane.

Sample solution

Prepare two sample solutions from two different weighted portions.

Dissolve approx. 177 mg Lavender oil in 10 mL internal standard solution.

Reference solution

Prepare two reference solutions from two different weighted portions.

Dissolve approx. 35 mg Linalool in 10 mL internal standard solution.

Figure 1: Chromatogram of Lavender oil, batch HWI01630-2

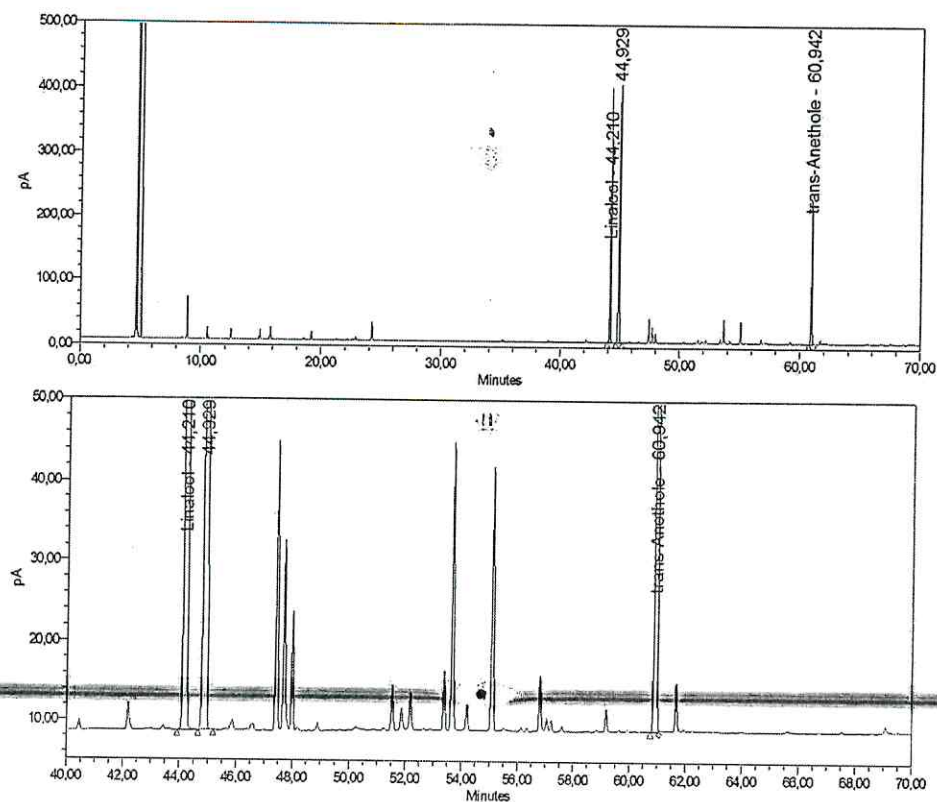

Figure 2: Chromatogram of primary reference standard Linalool, batch HWI01135-1

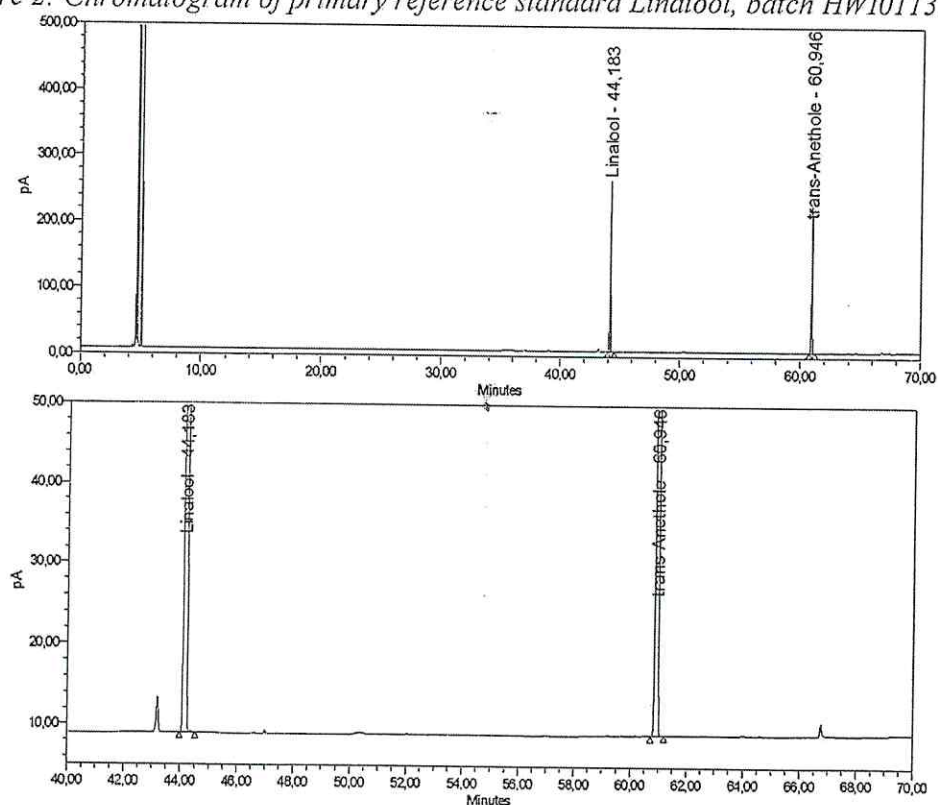

HPTLC performed by CAMAG (Multi-method for several essential oils)



## HPTLC Fingerprints of Essential oil

### Scope

Identification of zones seen in the HPTLC fingerprint of essential oils secondary reference standards obtained with the standard HPTLC method for identification of essential oils (submitted to Ph. Eur. for evaluation) by comparison of  $R_f$  values and colors of reference substances and matching zones in the extract.

### Instrumentation

Automatic TLC Sampler (ATS 4), Automatic Developing Chamber (ADC 2), Derivatizer, TLC Plate Heater 3, TLC Visualizer 2, visionCATS 2.4 (each entry an SOP, a visionCATS instrument method, and a visionCATS Comparison Viewer file with reference images).

### Samples

Essential oils are prepared as follows in toluene:

- Chamomile oil, clove oil, lemongrass oil, rose oil, and thyme oil are prepared at 5  $\mu\text{L/mL}$ .
- Coriander oil, eucalyptus oil, lavender oil, neroli oil, and star anise oil are prepared at 10  $\mu\text{L/mL}$ .
- Rosemary oil is prepared at 20  $\mu\text{L/mL}$ .
- Turpentine oil is prepared at 100  $\mu\text{L/mL}$ .

### Standards

Standard solutions are prepared in toluene at the following concentrations:

- Citronellol, citronellal, and eugenol: 0.5  $\mu\text{L/mL}$
- $\alpha$ -bisabolol,  $\alpha$ -bisaboloxide A, bornyl acetate, carvacrol, geranyl acetate, linalool, linalyl acetate, and terpinen-4-ol: 1  $\mu\text{L/mL}$
- Eucalyptol: 3  $\mu\text{L/mL}$
- *trans*-Anethole: 5  $\mu\text{L/mL}$
- 1,8-Cineole: 10  $\mu\text{L/mL}$
- Menthone and menthofuran: 20  $\mu\text{L/mL}$
- (R)-(+)-limonene: 120  $\mu\text{L/mL}$
- (-)-Carvone: 0.35 mg/mL
- (+)-Borneol, isoeugenyl acetate, and thymol: 0.5 mg/mL
- Menthol: 1.5 mg/mL
- Patchoulol: 2 mg/mL
- D/L-Camphor: 12.5 mg/mL
- (+)- $\alpha$ -Terpineol in methanol: 1 mg/mL

Neither  $\alpha$ -pinene (5  $\mu\text{L/mL}$ ),  $\beta$ -pinene (5  $\mu\text{L/mL}$ ), nor  $\gamma$ -terpinene (1  $\mu\text{L/mL}$ ) in toluene are not detectable!




**Chromatography according to standard HPTLC method for identification of essential oils (submitted to Ph. Eur. for evaluation)**

|                     |                                                                                                                                                                                                                                                                                                                     |
|---------------------|---------------------------------------------------------------------------------------------------------------------------------------------------------------------------------------------------------------------------------------------------------------------------------------------------------------------|
| Stationary phase    | HPTLC Si 60 F <sub>254</sub> , 20 x 10 cm (Merck).                                                                                                                                                                                                                                                                  |
| Sample application  | Bandwise application with ATS 4, 15 tracks, band length 8 mm, track distance 11.4 mm, distance from left edge 20 mm, distance from lower edge 8 mm, application volume 2 µL for test solutions and standards solutions.                                                                                             |
| Developing solvents | Ethyl acetate – toluene (5:95; v/v).                                                                                                                                                                                                                                                                                |
| Development         | In the ADC 2 with chamber saturation (with filter paper) for 20 min and after conditioning at 33% relative humidity for 10 min using a saturated solution of magnesium chloride MgCl <sub>2</sub> .                                                                                                                 |
| Developing distance | 70 mm (from the lower edge).                                                                                                                                                                                                                                                                                        |
| Plate drying        | Drying 5 min in the ADC 2.                                                                                                                                                                                                                                                                                          |
| Documentation       | With the TLC Visualizer 2 under white light and under UV 366 nm after derivatization.                                                                                                                                                                                                                               |
| Derivatization      | The plate is sprayed with the Anisaldehyde reagent using the Derivatizer (nozzle: blue, spraying level: 1; spraying volume: 3 mL) and heated at 100 °C for 3 min.<br>Anisaldehyde reagent: mixture of 0.5 mL of <i>p</i> -anisaldehyde, 10 mL of glacial acetic acid, 85 mL of methanol, and 5 mL of sulfuric acid. |

**Lavender oil (Cat. No. 05531501 #HWI01630-1)**

Documentation With the TLC Visualizer 2 under white light and UV 366 nm after derivatization.

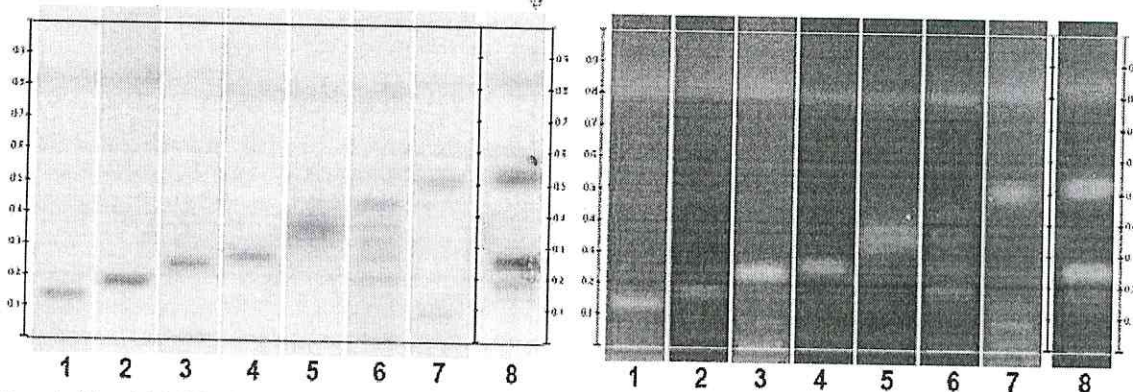

From left to right: HPTLC chromatograms under white light and UV 366 nm after derivatization. Track 1: (+)- $\alpha$ -terpineol ( $R_F$  0.13) (art. N°: 83073, batch: BCBS7535V); 2: (+)-borneol ( $R_F$  0.18) (art. N°: 68878, batch: 14627); 3: linalool ( $R_F$  0.24) (art. N°: 00350190, batch: HWI01135-1); 4: terpinen-4-ol ( $R_F$  0.26) (art. N°: 03900590, batch: HWI00630-3); 5: 1,8-cineole ( $R_F$  0.35) (art. N°: 00020590, batch: HWI00654-2); 6: (R)-(+)-Limonene (main zone at  $R_F$  0.44; other zones due to degradations below) (art. N°: 00590590, batch: HWI01323-2); 7: linalyl acetate ( $R_F$  0.52) (art. N°: 49599, batch: BCBS8744V); 8: lavender oil (art. N°: 05531501, batch: HWI01630-1)
