# Supplementary material for: Phytochemical Screening and Antibacterial Activity of Commercially Available Essential Oils Combinations with Conventional Antibiotics against Gram-Positive and Gram-Negative Bacteria
Source: Preprints.org preprint supplement (doi:10.20944/preprints202404.1441.v1), 2024-04-23
Supplement: Supplementary file 5 [file supplementary]

**Certificate of Analysis**  
**Secondary reference standard**

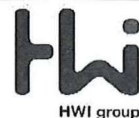

|                             |                                                                         |                    |      |
|-----------------------------|-------------------------------------------------------------------------|--------------------|------|
| Substance:                  | Eucalyptus oil                                                          | Specification no.: | 1876 |
| Article no:                 | 0550-15-01                                                              |                    |      |
| Batch:                      | HWI01627-3                                                              |                    |      |
| Storage:                    | amber glass ampoule, storage at ambient temperature and under inert gas |                    |      |
| Expiry date <sup>1)</sup> : | 10/2022                                                                 |                    |      |

| Parameter                   | Method*      | Requirement                          | Result   |
|-----------------------------|--------------|--------------------------------------|----------|
| Characters                  |              |                                      |          |
| Appearance                  | organoleptic | colourless to slightly yellow liquid | complies |
| Identity (GC) <sup>2)</sup> | AM0952       | 1,8-Cineole                          | complies |
|                             |              | α-Pinene                             | complies |
|                             |              | Limonene                             | complies |
| Assay (GC)                  |              |                                      |          |
| 1,8-Cineole                 | AM0952       | ---                                  | 823 mg/g |

\* valid version at time of testing

<sup>1)</sup> storage in unopened, original container according to specified conditions

<sup>2)</sup> test only performed when substance is initially tested

checked and approved

12. NOV. 2020

Katharina Werling

Project leader  
Laboratory Services

12. NOV. 2020

Stefanie Kempf

Project leader  
Laboratory Services

Essential oil: Eucalyptus oil  
Article-no.: 0550-15-01  
Batch: HWI01627-3  
Calibration standard: primary reference standard 1,8-Cineol

GC method (AM0952)

Column type: Supelcowax 10; 60 m x 0.25 mm; 0.25 µm  
Carrier gas: Helium  
Flow: 1.5 ml/min  
Oven: 60 °C, 5 min, 5 °C/min, 200 °C, 5 min  
Detector: 220 °C  
Injector: 220 °C  
Injection volume: 1 µL  
Split: 1:50  
Run time: 38 min

Internal standard solution

Transfer approx. 800 mg trans-Anethole into a 50.0 mL volumetric flask, dissolve in solvent and fill up to the mark with solvent.

Sample solution

Prepare two sample solutions from two different weighted portions.

Dissolve approx. 185 mg Eucalyptus oil in a 10.0 mL volumetric flask, dissolve in 5.0 mL internal standard solution and fill up to the mark with solvent.

Reference solution

Prepare two reference solutions from two different weighted portions.

Transfer approx. 46.5 mg 1,8-Cineole into a 10.0 mL volumetric flask, dissolve in 5.0 mL internal standard solution and fill up to the mark with solvent.

Figure 1: Chromatogram of Eucalyptus oil, batch HWI01627-3

Eucalyptus oil

Batch\_No HWI01627

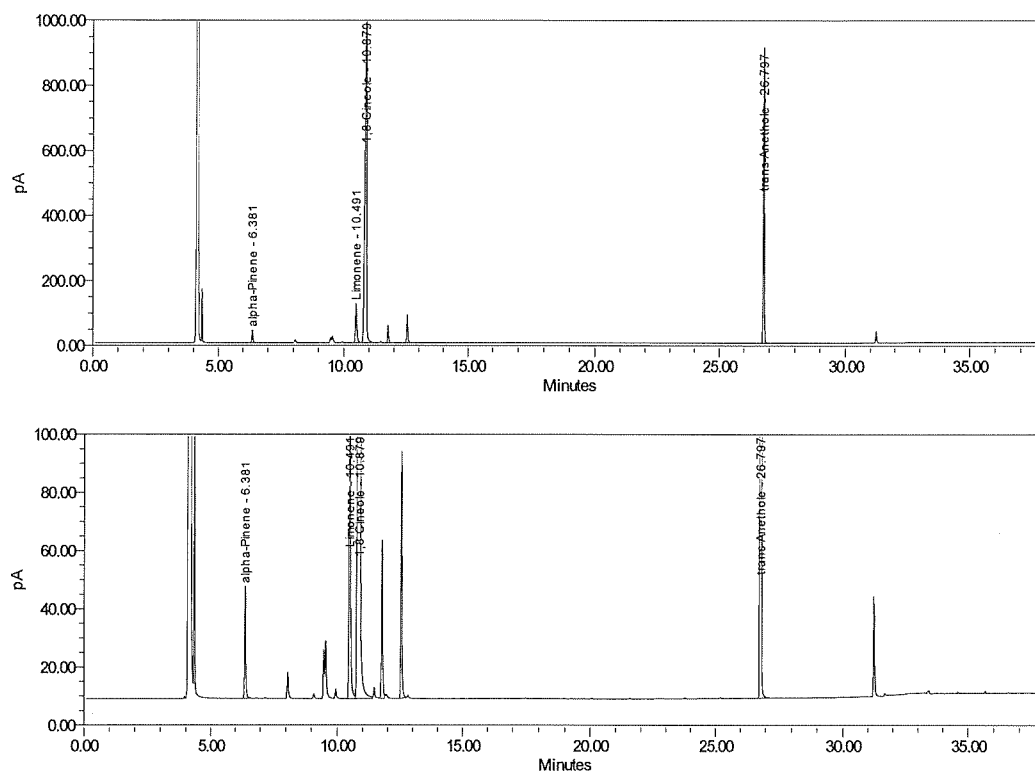

ELH20-02122-68; Eucalyptus oil; Batch\_No HWI01627; Wednesday, October 28, 2020 8:45:48 PM CET;  
Result Id 1286

Figure 2: Chromatogram of primary reference standard 1,8-Cineol, batch HWI00654

Reference solution 1

Batch\_No

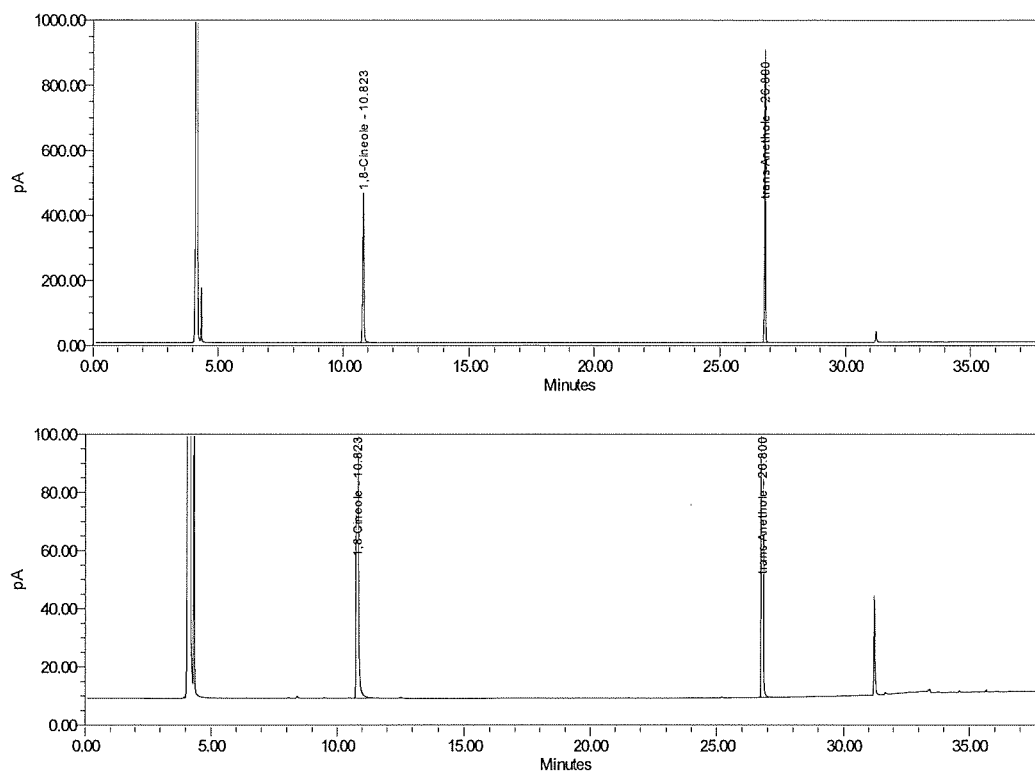

ELH20-02122-40; Reference solution 1; Batch\_No ; Wednesday, October 28, 2020 2:56:16 PM CET;  
Result Id 1316
