# Supplementary material for: Phytochemical Screening and Antibacterial Activity of Commercially Available Essential Oils Combinations with Conventional Antibiotics against Gram-Positive and Gram-Negative Bacteria
Source: Preprints.org preprint supplement (doi:10.20944/preprints202404.1441.v1), 2024-04-23
Supplement: Supplementary file 6 [file supplementary]

Archive with 6 entries (6 files):
- COA - Clove bud oil.pdf
- COA - Eucalyptus oil.pdf
- COA - Lavender oil.pdf
- COA - Oregano oil.pdf
- COA - Peppermint oil.pdf
- Figure S1, Table S1.docx
